# Supplementary material
Source: PubMed Central journal article supplement (PMC129712)
Supplement: pnas_212068599_2.pdf [file pnas_212068599_2.pdf]

**Table 2. Designed and native sequences for different backbone structures of the SH3 domain**

| Protein           | % id  | Sequence                                                                                                                                                                                                                                                                                                              |
|-------------------|-------|-----------------------------------------------------------------------------------------------------------------------------------------------------------------------------------------------------------------------------------------------------------------------------------------------------------------------|
| CRK_RAT (1cka)    | 100   | EYV <b>R</b> AL <b>F</b> DFNGNDEED <b>L</b> PFK <b>K</b> GD <b>I</b> L <b>R</b> IRDK <b>P</b> EE-QW <b>N</b> AE <b>D</b> SE-G <b>K</b> RG <b>M</b> IP <b>V</b> PP <b>V</b> VE <b>K</b> Y                                                                                                                              |
| Minimum           | 30.77 | K <b>R</b> V <b>W</b> AR <b>Y</b> W <b>F</b> W <b>G</b> RRR <b>Q</b> QL <b>P</b> F <b>Q</b> Q <b>Q</b> EL <b>E</b> I <b>Q</b> Y <b>E</b> P <b>D</b> R-Y <b>W</b> KK <b>A</b> K <b>D</b> RR-G <b>R</b> EG <b>Q</b> IP <b>D</b> P <b>Q</b> V <b>Q</b> H <b>Q</b>                                                        |
| Best              | 40.38 | Q <b>R</b> V <b>R</b> AR <b>Q</b> D <b>F</b> W <b>G</b> RRR <b>Q</b> QL <b>P</b> F <b>R</b> GE <b>F</b> L <b>E</b> I <b>R</b> R <b>K</b> P <b>D</b> Q-Y <b>W</b> L <b>Q</b> A <b>Q</b> V <b>R</b> R-G <b>Q</b> Q <b>G</b> L <b>I</b> P <b>L</b> P <b>V</b> ES <b>A</b>                                                |
| SPCN_CHICK (1shg) | 100   | EL <b>V</b> LAL <b>Y</b> D <b>Y</b> Q <b>E</b> KS <b>P</b> RE <b>V</b> T <b>M</b> KK <b>G</b> D <b>I</b> L <b>T</b> LL <b>N</b> S <b>T</b> N <b>K</b> -D <b>W</b> W <b>K</b> V <b>E</b> V <b>N</b> --D <b>R</b> Q <b>G</b> F <b>V</b> PA <b>A</b> Y <b>V</b> KK <b>L</b>                                              |
| Minimum           | 20.75 | Q <b>K</b> A <b>Q</b> A <b>Q</b> R <b>E</b> F <b>R</b> R <b>R</b> Q <b>P</b> R <b>Q</b> V <b>Q</b> V <b>K</b> Q <b>G</b> E <b>E</b> V <b>E</b> K <b>R</b> Q <b>W</b> R <b>N</b> R-Y <b>F</b> V <b>Q</b> I <b>K</b> V <b>R</b> --Y <b>Y</b> Q <b>G</b> F <b>V</b> PN <b>W</b> I <b>I</b> R <b>E</b> K                  |
| Best              | 26.42 | F <b>E</b> AL <b>A</b> K <b>N</b> E <b>F</b> R <b>R</b> R <b>Q</b> P <b>R</b> Q <b>V</b> Q <b>M</b> K <b>Q</b> G <b>E</b> R <b>V</b> EM <b>R</b> Q <b>W</b> R <b>N</b> R-Y <b>F</b> V <b>Q</b> V <b>K</b> V <b>K</b> --Y <b>Y</b> Q <b>G</b> F <b>V</b> PK <b>W</b> L <b>I</b> Q <b>E</b> R                           |
| SPCN_CHICK (1pwt) | 100   | EL <b>V</b> LAL <b>Y</b> D <b>Y</b> Q <b>E</b> KS <b>P</b> RE <b>V</b> T <b>M</b> KK <b>G</b> D <b>I</b> L <b>T</b> LL <b>N</b> S <b>T</b> N <b>K</b> -D <b>W</b> W <b>K</b> V <b>E</b> V <b>N</b> --D <b>R</b> Q <b>G</b> F <b>V</b> PA <b>A</b> Y <b>V</b> KK <b>L</b>                                              |
| Minimum           | 20.75 | S <b>K</b> AR <b>A</b> ER <b>W</b> F <b>R</b> Q <b>R</b> Q <b>P</b> Y <b>Q</b> V <b>Q</b> M <b>Q</b> G <b>E</b> E <b>V</b> E <b>V</b> K <b>Q</b> Y <b>N</b> N <b>R</b> -Y <b>F</b> V <b>K</b> V <b>K</b> V <b>R</b> --Y <b>W</b> Q <b>G</b> Q <b>V</b> PK <b>W</b> Q <b>I</b> R <b>E</b> R                            |
| Best              | 28.3  | Q <b>K</b> CL <b>A</b> R <b>Q</b> D <b>F</b> R <b>Q</b> R <b>Q</b> P <b>Y</b> Q <b>V</b> Q <b>M</b> RR <b>G</b> E <b>E</b> V <b>E</b> L <b>K</b> Q <b>D</b> R <b>N</b> R-Y <b>F</b> AK <b>V</b> K <b>V</b> R--Y <b>Y</b> Q <b>G</b> Q <b>V</b> PN <b>W</b> Q <b>I</b> Q <b>K</b> R                                    |
| SEM5_CAEEL (1sem) | 100   | K <b>F</b> V <b>Q</b> AL <b>F</b> DF <b>N</b> P <b>Q</b> ES <b>G</b> EL <b>A</b> F <b>K</b> R <b>G</b> D <b>V</b> I <b>T</b> L <b>I</b> N <b>K</b> D <b>D</b> P-N <b>W</b> W <b>E</b> G <b>Q</b> L <b>N</b> --N <b>R</b> R <b>G</b> I <b>F</b> PS <b>N</b> Y <b>V</b> CP <b>Y</b>                                     |
| Minimum           | 27.45 | Q <b>R</b> VE <b>A</b> Q <b>Y</b> E <b>F</b> K <b>P</b> Q <b>Y</b> Y <b>Q</b> LE <b>C</b> Q <b>Q</b> G <b>Q</b> L <b>K</b> K <b>E</b> NE <b>Y</b> NP-Y <b>W</b> IE <b>C</b> RL <b>R</b> --Y <b>Y</b> R <b>G</b> RL <b>P</b> K <b>D</b> R <b>V</b> K <b>P</b> K                                                        |
| Best              | 33.33 | K <b>K</b> V <b>W</b> G <b>Q</b> Y <b>E</b> F <b>R</b> P <b>Q</b> Y <b>Y</b> Q <b>L</b> Q <b>F</b> R <b>Q</b> G <b>C</b> E <b>I</b> L <b>K</b> D <b>R</b> R <b>N</b> P-Y <b>W</b> FK <b>G</b> Q <b>L</b> Y--Y <b>Y</b> Q <b>G</b> Q <b>F</b> P <b>G</b> Q <b>R</b> V <b>Q</b> P <b>R</b>                              |
| FYN_HUMAN (1shf)  | 100   | T <b>L</b> F <b>V</b> AL <b>Y</b> D <b>Y</b> E <b>A</b> R <b>T</b> ED <b>D</b> LS <b>F</b> H <b>K</b> G <b>E</b> K <b>F</b> Q <b>I</b> L <b>N</b> S <b>S</b> E <b>G</b> -D <b>W</b> W <b>E</b> A <b>R</b> S <b>L</b> T <b>T</b> G <b>E</b> T <b>G</b> Y <b>I</b> PS <b>N</b> Y <b>V</b> AP <b>V</b>                   |
| Minimum           | 21.82 | Q <b>Q</b> Y <b>E</b> G <b>K</b> R <b>Q</b> L <b>R</b> Q <b>R</b> Y <b>Q</b> Y <b>E</b> L <b>Q</b> F <b>Q</b> G <b>A</b> R <b>F</b> K <b>A</b> D <b>Q</b> Y <b>R</b> E <b>G</b> -R <b>Y</b> Q <b>Q</b> C <b>Q</b> I <b>R</b> W <b>R</b> G <b>Q</b> R <b>G</b> K <b>I</b> P <b>Q</b> W <b>V</b> RP <b>V</b>            |
| Best              | 30.91 | Q <b>Q</b> F <b>E</b> G <b>K</b> Y <b>R</b> F <b>S</b> K <b>Q</b> Y <b>Q</b> Y <b>Q</b> L <b>D</b> F <b>Y</b> Q <b>G</b> L <b>R</b> F <b>E</b> I <b>R</b> Q <b>E</b> R <b>E</b> G-Q <b>W</b> G <b>Q</b> A <b>R</b> D <b>K</b> R <b>K</b> G <b>D</b> E <b>G</b> K <b>I</b> P <b>K</b> W <b>V</b> RP <b>V</b>           |
| HCK_HUMAN (1qcf)  | 100   | I <b>I</b> V <b>V</b> AL <b>Y</b> D <b>Y</b> E <b>A</b> I <b>H</b> H <b>E</b> DL <b>S</b> F <b>Q</b> K <b>G</b> D <b>Q</b> M <b>V</b> V <b>L</b> E <b>S</b> G <b>E</b> --W <b>W</b> K <b>A</b> R <b>S</b> L <b>A</b> T <b>R</b> K <b>E</b> G <b>Y</b> I <b>P</b> S <b>N</b> Y <b>V</b> AR <b>V</b>                    |
| Minimum           | 20    | Q <b>K</b> V <b>K</b> G <b>K</b> Y <b>Q</b> R <b>W</b> K <b>Q</b> Y <b>Y</b> E <b>L</b> W <b>F</b> Q <b>Q</b> G <b>E</b> E <b>L</b> K <b>L</b> Q <b>R</b> Q <b>Q</b> Y <b>Y</b> --W <b>D</b> Q <b>A</b> E <b>K</b> E <b>R</b> N <b>K</b> E <b>Q</b> G <b>I</b> P <b>R</b> F <b>L</b> V <b>E</b> S <b>R</b>            |
| Best              | 27.27 | K <b>R</b> V <b>K</b> G <b>K</b> Y <b>D</b> Q <b>R</b> K <b>R</b> D <b>Q</b> Y <b>E</b> L <b>D</b> F <b>R</b> R <b>G</b> E <b>Q</b> L <b>I</b> K <b>Q</b> E <b>R</b> W <b>Q</b> --Y <b>Q</b> K <b>A</b> E <b>A</b> Q <b>R</b> K <b>K</b> Q <b>K</b> G <b>K</b> I <b>P</b> A <b>R</b> V <b>E</b> S <b>V</b>            |
| CRK_RAT (1ckb)    | 100   | EYV <b>R</b> AL <b>F</b> DFNGNDEED <b>L</b> PFK <b>K</b> GD <b>I</b> L <b>R</b> IRDK <b>P</b> EE-QW <b>N</b> AE <b>D</b> SE-G <b>K</b> RG <b>M</b> IP <b>V</b> PP <b>V</b> VE <b>K</b> Y                                                                                                                              |
| Minimum           | 28.85 | R <b>W</b> VE <b>G</b> K <b>Y</b> D <b>F</b> R <b>G</b> Q <b>Y</b> Q <b>D</b> Q <b>L</b> P <b>F</b> R <b>Q</b> G <b>E</b> R <b>L</b> K <b>I</b> K <b>Q</b> Q <b>P</b> DS-Y <b>Y</b> L <b>K</b> A <b>E</b> D <b>R</b> Y-R <b>R</b> E <b>G</b> K <b>I</b> P <b>R</b> PR <b>V</b> K <b>S</b> A                           |
| Best              | 38.46 | Y <b>Q</b> V <b>K</b> G <b>R</b> D <b>D</b> F <b>R</b> G <b>Q</b> R <b>Y</b> D <b>L</b> P <b>F</b> RR <b>G</b> Y <b>I</b> L <b>K</b> I <b>Q</b> Q <b>Q</b> P <b>D</b> Q-Q <b>W</b> L <b>K</b> A <b>R</b> D <b>Q</b> Y-G <b>R</b> E <b>G</b> D <b>I</b> P <b>R</b> PR <b>V</b> ES <b>Q</b>                             |
| SRC_HUMAN (2src)  | 100   | T <b>T</b> F <b>V</b> AL <b>Y</b> D <b>Y</b> E <b>S</b> R <b>T</b> ET <b>D</b> LS <b>F</b> K <b>K</b> G <b>E</b> R <b>L</b> Q <b>I</b> V <b>N</b> N <b>T</b> E <b>G</b> -D <b>W</b> W <b>L</b> A <b>H</b> S <b>L</b> S <b>T</b> G <b>Q</b> T <b>G</b> Y <b>I</b> PS <b>N</b> Y <b>V</b> AP <b>S</b>                   |
| Minimum           | 21.82 | D <b>L</b> Y <b>L</b> G <b>K</b> Y <b>Q</b> F <b>W</b> RR <b>R</b> Q <b>Y</b> Q <b>L</b> D <b>F</b> R <b>Q</b> G <b>L</b> R <b>L</b> K <b>G</b> Q <b>Y</b> R <b>Y</b> Q-R <b>W</b> F <b>Q</b> A <b>E</b> C <b>Q</b> N <b>W</b> K <b>R</b> R <b>G</b> Q <b>I</b> P <b>A</b> D <b>Y</b> I <b>Q</b> P <b>Q</b>           |
| Best              | 27.27 | D <b>L</b> W <b>L</b> G <b>K</b> Y <b>Q</b> F <b>W</b> K <b>R</b> R <b>E</b> T <b>Q</b> L <b>Q</b> F <b>R</b> Q <b>G</b> E <b>Q</b> L <b>K</b> A <b>Q</b> Q <b>Y</b> R <b>Y</b> R-Y <b>W</b> I <b>Q</b> A <b>Q</b> A <b>Q</b> W <b>R</b> R <b>R</b> Q <b>G</b> Q <b>I</b> P <b>N</b> Q <b>Y</b> L <b>Q</b> P <b>Q</b> |
| SPCN_CHICK (1bk2) | 100   | EL <b>V</b> LAL <b>Y</b> D <b>Y</b> Q <b>E</b> KS <b>P</b> RE <b>V</b> T <b>M</b> KK <b>G</b> D <b>I</b> L <b>T</b> LL <b>N</b> S <b>T</b> N <b>K</b> -D <b>W</b> W <b>K</b> V <b>E</b> V <b>N</b> --D <b>R</b> Q <b>G</b> F <b>V</b> PA <b>A</b> Y <b>V</b> KK <b>L</b>                                              |
| Minimum           | 18.87 | D <b>Y</b> AD <b>A</b> RR <b>Q</b> F <b>Q</b> K <b>R</b> Q <b>P</b> W <b>Q</b> V <b>Q</b> M <b>Y</b> Q <b>G</b> E <b>R</b> VE <b>V</b> K <b>Q</b> Y <b>R</b> N <b>Q</b> -Y <b>Y</b> VE <b>I</b> Q <b>V</b> R--S <b>Y</b> R <b>G</b> Q <b>V</b> PK <b>Q</b> L <b>I</b> R <b>K</b> R                                    |
| Best              | 26.42 | D <b>Y</b> GL <b>A</b> Q <b>R</b> Q <b>F</b> Q <b>W</b> R <b>Q</b> P <b>Y</b> Q <b>V</b> M <b>Y</b> Q <b>G</b> E <b>R</b> CE <b>F</b> K <b>Q</b> Y <b>R</b> N <b>R</b> -Y <b>Y</b> I <b>K</b> I <b>Q</b> V <b>R</b> --S <b>Y</b> Q <b>G</b> Q <b>V</b> PN <b>Q</b> L <b>V</b> R <b>K</b> Q                            |
| ABL_FSVHY (1abo)  | 100   | N <b>L</b> F <b>V</b> AL <b>Y</b> D <b>F</b> VAS <b>G</b> DN <b>T</b> LS <b>I</b> T <b>K</b> G <b>E</b> K <b>L</b> R <b>V</b> L <b>G</b> Y <b>N</b> H <b>N</b> G <b>E</b> W <b>C</b> E <b>A</b> Q <b>T</b> K--N <b>G</b> Q <b>G</b> W <b>V</b> PS <b>N</b> Y <b>I</b> TP <b>V</b>                                     |
| Minimum           | 30.19 | - <b>Q</b> Y <b>Q</b> A <b>K</b> Y <b>Q</b> F <b>W</b> Q <b>R</b> GS <b>Y</b> Q <b>L</b> I <b>Y</b> Q <b>S</b> Y <b>Q</b> M <b>K</b> Q <b>G</b> D <b>R</b> Y <b>D</b> D <b>K</b> A <b>V</b> Q <b>V</b> R--N <b>G</b> Q <b>G</b> W <b>V</b> PN <b>R</b> Y <b>I</b> E <b>P</b> R                                        |
| Best              | 35.85 | -D <b>N</b> V <b>A</b> Q <b>Y</b> E <b>F</b> R <b>Q</b> RS <b>Y</b> Q <b>L</b> I <b>K</b> Q <b>G</b> E <b>R</b> M <b>R</b> L <b>Q</b> G <b>Q</b> T <b>S</b> Y <b>R</b> Y <b>G</b> K <b>V</b> Q <b>C</b> R--R <b>G</b> Q <b>G</b> W <b>V</b> FW <b>Q</b> Y <b>I</b> Q <b>P</b> Q                                       |
| SRC_HUMAN (1fmk)  | 100   | T <b>T</b> F <b>V</b> AL <b>Y</b> D <b>Y</b> E <b>S</b> R <b>T</b> ET <b>D</b> LS <b>F</b> K <b>K</b> G <b>E</b> R <b>L</b> Q <b>I</b> V <b>N</b> N <b>T</b> E <b>G</b> -D <b>W</b> W <b>L</b> A <b>H</b> S <b>L</b> S <b>T</b> G <b>Q</b> T <b>G</b> Y <b>I</b> PS <b>N</b> Y <b>V</b> AP <b>S</b>                   |
| Minimum           | 21.82 | E <b>Q</b> L <b>K</b> G <b>E</b> Y <b>D</b> F <b>R</b> K <b>Q</b> Y <b>R</b> Q <b>L</b> Q <b>F</b> Q <b>G</b> K <b>I</b> L <b>Q</b> V <b>W</b> Y <b>R</b> Q <b>S</b> Q-R <b>Y</b> L <b>F</b> A <b>Q</b> A <b>Q</b> D <b>N</b> RR <b>R</b> G <b>Y</b> I <b>P</b> Q <b>Q</b> Q <b>V</b> RP <b>R</b>                     |
| Best              | 29.09 | D <b>Q</b> V <b>Q</b> G <b>K</b> Y <b>D</b> F <b>R</b> K <b>Q</b> Y <b>Q</b> W <b>D</b> L <b>D</b> F <b>Q</b> R <b>G</b> R <b>I</b> L <b>Q</b> I <b>W</b> Y <b>K</b> Q <b>S</b> Q-R <b>Y</b> L <b>L</b> A <b>W</b> V <b>Q</b> D <b>R</b> Y <b>Q</b> Q <b>G</b> Y <b>I</b> P <b>Q</b> Q <b>R</b> VP <b>R</b> P         |
| Q74596 (1qmc)     | 100   | FR <b>V</b> Y <b>Y</b> ---R <b>D</b> SR-----N <b>P</b> L <b>W</b> K <b>G</b> P <b>A</b> K <b>L</b> L <b>W</b> K-GE-G <b>A</b> V <b>V</b> I <b>Q</b> D <b>N</b> S-D <b>I</b> K <b>V</b> V <b>P</b> R <b>R</b> K <b>A</b> K <b>I</b> I <b>R</b>                                                                         |

| Protein          | % id  | Sequence                                                    |
|------------------|-------|-------------------------------------------------------------|
| Minimum          | 20.41 | DQLFF---QLQR-----QPYNGPAQLRKE-DD-RYVEAQERD-QYKQFPRYQAQRH    |
| Best             | 26.53 | DKVKA---KGSY-----RPDWRGPAELRDE-RY-DYVRIKERD-RERQVPRRQARREH  |
| gi8569261 (1ex4) | 100   | FRVYY---RDSR-----NSLWKGPAKLLWK-GE-GAVVIQDNS-DIKVVPRKAKII-   |
| Minimum          | 24.44 | TKVFF---KEQY-----NWRWWGPGELQRQ-DQ-RYVQIQFY-DQKRIPIQQAQER-   |
| Best             | 26.67 | TKVFF---QEQR-----NYRQWGPALQRR-DR-YYVQVQFY-DQKRIPIQKAWER-    |
| 1cka MD20        | 100   | EYVRALFDNFNGDEEDLPFKKGDILRIRDKPEE-QWNAEDSE-GKRGMIPVPYVEKY   |
| Minimum          | 28.85 | EWAKMKYWLQGRQRRELPVWDKIRIKIRRRPNY-QWIEAEDQY-GQRGWVPRPYFEQQ  |
| Best             | 30.77 | EDARAREQLDGRQRRELPARQRIRLWIRQEPNK-QWKQAQDQW-GQQGWIPDPKVVYSK |
| 1cka MD40        | 100   | EYVRALFDNFNGDEEDLPFKKGDILRIRDKPEE-QWNAEDSE-GKRGMIPVPYVEKY   |
| Minimum          | 28.85 | SQQRAQYQLRGQDRYLLPLRQGQWLKDRQRPY-RQLEGEDQY-GRRGWLDPYLEYK    |
| Best             | 28.85 | RRLRAQYELRGQDRYLLPLRQGQWLKDRQRPY-RQIEGEDWR-GRRGFLDPYLEYL    |
| 1cka MD150       | 100   | EYVRALFDNFNGDEEDLPFKKGDILRIRDKPEE-QWNAEDSE-GKRGMIPVPYVEKY   |
| Minimum          | 19.23 | YWVRIQYQYWGQYYRQLPARQGYRQQQDRPDR-KKLLKLDER-GFQGEPLDPYQWRN   |
| Best             | 32.69 | YYQRAQYQYGNYSRQLPFYQGDRKLVQQRPDR-KKVQCEDQR-GFRGEAPDPYLWRN   |
