# Supplementary material
Source: PubMed Central journal article supplement (PMC129712)
Supplement: pnas_212068599_3.pdf [file pnas_212068599_3.pdf]

**Table 3. *P* values corresponding to the average pairwise sequence identity levels computed between members of each family of designed sequences and the native sequence of the given protein, for which the fold name is given in the first column and the PDB ID code is given in the second**

| <b>Fold</b> | <b>PDB ID</b> | <b>Best-all</b> | <b>Min-all</b> | <b>Core</b> | <b>Surf</b> |        |
|-------------|---------------|-----------------|----------------|-------------|-------------|--------|
| SH3         | 1cka          | 3.4e-16         | 4.1e-10        | 5.5e-15     | 3.4e-1      |        |
|             | 1shg          | 1.6e-7          | 2.9e-5         | 2.2e-4      | 1.7e-2      |        |
|             | 1pwt          | 2.4e-8          | 2.9e-5         | 5.7e-9      | 5.4e-1      |        |
|             | 1sem          | 4.8e-11         | 2.4e-8         | 5.7e-9      | 9.9e-2      |        |
|             | 1shf          | 4.1e-10         | 5.7e-6         | 1.1e-7      | 3.4e-1      |        |
|             | 1qcf          | 2.4e-8          | 2.9e-5         | 5.7e-9      | 5.4e-1      |        |
|             | 1ckb          | 4.2e-15         | 3.3e-9         | 2.4e-13     | 5.4e-1      |        |
|             | 2src          | 2.4e-8          | 5.7e-6         | 1.1e-7      | 3.4e-1      |        |
|             | 1bk2          | 1.6e-7          | 1.4e-4         | 1.7e-6      | 5.4e-1      |        |
|             | 1abo          | 5.2e-13         | 4.1e-10        | 2.4e-10     | 3.4e-1      |        |
|             | 1fmk          | 3.3e-9          | 5.7e-6         | 1.1e-7      | 5.4e-1      |        |
|             | average       | 2.0e-10         | 6.4e-7         | 4.7e-9      | 2.9e-1      |        |
|             | Homeobox      | 1enh            | 1.0e-6         | 2.9e-5      | 2.2e-4      | 9.9e-2 |
|             |               | 1fjl            | 1.6e-7         | 2.1e-3      | 1.8e-3      | 3.4e-1 |
| 9ant        |               | 5.2e-13         | 2.1e-3         | 1.7e-6      | 3.4e-1      |        |
| 1mnm        |               | 2.9e-5          | 2.1e-3         | 2.1e-5      | 3.4e-1      |        |
| 1au7        |               | 1.0e-6          | 6.9e-3         | 2.1e-5      | 5.4e-1      |        |
| 1b72        |               | 2.4e-8          | 1.4e-4         | 1.1e-7      | 5.4e-1      |        |
| 1b8i        |               | 3.3e-9          | 6.9e-3         | 2.1e-5      | 3.4e-1      |        |
| 1du0        |               | 2.4e-8          | 4.9e-2         | 1.8e-1      | 5.4e-1      |        |
| 2hdd        |               | 4.8e-11         | 5.7e-4         | 1.7e-6      | 5.4e-1      |        |
| average     |               | 1.8e-8          | 1.5e-3         | 3.9e-5      | 3.6e-1      |        |
| HTH         |               | 1r69            | 3.4e-16        | 4.1e-10     | 5.5e-15     | 9.9e-2 |
|             |               | 2cro            | 4.1e-10        | 2.9e-5      | 5.7e-9      | 5.4e-1 |
|             |               | 1lmb            | 3.3e-9         | 2.9e-5      | 2.2e-4      | 9.9e-2 |
|             |               | 1lli            | 2.4e-8         | 1.4e-4      | 2.1e-5      | 5.4e-1 |
|             | 1b0n          | 1.6e-7          | 5.7e-4         | 2.2e-4      | 5.4e-1      |        |
|             | 1per          | 1.8e-18         | 5.2e-13        | 5.5e-15     | 9.9e-2      |        |
|             | average       | 1.2e-11         | 4.9e-7         | 7.5e-9      | 2.3e-1      |        |
| Protein G   | 1pgb          | 1.6e-7          | 5.7e-4         | 1.1e-2      | 3.4e-1      |        |
|             | 2igd          | 4.1e-10         | 3.3e-9         | 2.4e-13     | 3.4e-1      |        |
|             | average       | 8.1e-9          | 1.4e-6         | 5.2e-8      | 3.4e-1      |        |
| CI2         | 2ci2          | 2.4e-8          | 5.7e-6         | 5.7e-9      | 9.9e-2      |        |
|             | 1cse          | 4.8e-11         | 1.6e-7         | 5.5e-15     | 1.7e-2      |        |
|             | 1ypc          | 5.2e-13         | 3.3e-9         | 2.4e-10     | 9.9e-2      |        |
|             | 2tec          | 3.3e-9          | 1.0e-6         | 2.4e-13     | 3.4e-1      |        |
|             | 2sec          | 3.3e-9          | 2.9e-5         | 5.7e-9      | 3.4e-1      |        |
|             | 1acb          | 4.8e-11         | 2.4e-8         | 2.2e-4      | 9.9e-2      |        |
|             | 1coa          | 5.2e-13         | 1.6e-7         | 2.4e-13     | 9.9e-2      |        |
|             | average       | 1.1e-10         | 3.2e-7         | 1.3e-10     | 1.1e-1      |        |
|             | Cold-shock    | 1csp            | 5.1e-12        | 2.4e-8      | 2.4e-13     | 3.4e-1 |
|             |               | 1mjc            | 5.1e-12        | 4.1e-10     | 9.6e-17     | 9.9e-2 |

| <b>Fold</b> | <b>PDB ID</b> | <b>Best-all</b> | <b>Min-all</b> | <b>Core</b> | <b>Surf</b> |
|-------------|---------------|-----------------|----------------|-------------|-------------|
|             | 1c9o          | 5.1e-12         | 4.1e-10        | 2.4e-13     | 3.4e-1      |
|             | 1csq          | 5.1e-12         | 2.4e-8         | 2.4e-10     | 9.9e-2      |
|             | average       | 5.1e-12         | 3.1e-9         | 1.9e-13     | 1.8e-1      |
| Antifreeze  | 1ops          | 1.6e-7          | 1.6e-7         | 5.7e-9      | 5.4e-1      |
|             | 1msi          | 2.4e-8          | 1.4e-4         | 2.2e-4      | 5.4e-1      |
|             | 2jia          | 1.6e-7          | 2.9e-5         | 5.7e-9      | 5.4e-1      |
|             | 1ame          | 1.6e-7          | 5.7e-4         | 2.2e-4      | 5.4e-1      |
|             | 1b7i          | 3.3e-9          | 1.4e-4         | 1.7e-6      | 5.4e-1      |
|             | 1ekl          | 4.1e-10         | 1.4e-4         | 2.2e-4      | 5.4e-1      |
|             | average       | 2.3e-8          | 4.3e-5         | 2.9e-6      | 5.4e-1      |

“average” in the second column denotes average values computed for the sequences designed for all the backbones of the fold. This average was computed as a geometric mean of the listed  $P$  values for the different backbones of each fold. To compute the  $P$  values, we used a uniform random sequence model and a binomial distribution of the sequence identity values. For further information and discussion of the results see main article.
