# Supplementary material
Source: PubMed Central journal article supplement (PMC129712)
Supplement: pnas_212068599_6.pdf [file pnas_212068599_6.pdf]

**Table 6. Native recognition scores obtained using the profile computed from the designed sequences for each protein in conjunction with the PSI-BLAST procedure, with standard settings**

| <b>Fold</b> | <b>PDB ID</b> | <b><i>E</i> value</b> |
|-------------|---------------|-----------------------|
| Cold-shock  | 1mjc          | 1e-07                 |
|             | 1c9o          | 0.009                 |
|             | 1csp          | 9.4                   |
|             | 1csq          | 9e-05                 |
| HTH         | 1per          | 3e-04                 |
|             | 1r69          | 5e-04                 |
| Protein G   | 2igd          | 1.2                   |
| SH3         | 1abo          | 5e-05                 |
|             | 1cka          | 3e-05                 |
|             | 1ckb          | 2e-08                 |
|             | 1shf          | 0.10                  |
|             | 1sem          | 4e-05                 |
|             | 1pwt          | 2.4                   |
|             | 1shg          | 7.6                   |
|             | 2src          | 6.2                   |
| Homeobox    | 9ant          | 0.082                 |
|             | 1enh          | 8.1                   |
|             | 2hdd          | 8.3                   |
|             | 1fjl          | 1.1                   |
|             | 1b72          | 1.4                   |
| CI2         | 1coa          | 4e-04                 |
|             | 1ypc          | 5e-05                 |
|             | 2ci2          | 0.011                 |
|             | 1acb          | 6e-04                 |
|             | 1cse          | 7e-05                 |
|             | 2sec          | 0.017                 |
|             | 2tec          | 0.002                 |

The PSI-BLAST searches were performed in the SWISS-PROT database, and limiting the number of iterations to one, to prevent contribution from natural sequences to the profile. The fold name is given in the first column, the protein PDB ID code is given in the second column, and the *E* value computed by PSI-BLAST is given in the third. For any further information, see text of main paper.
