# Supplementary material
Source: PubMed Central journal article supplement (PMC129712)
Supplement: pnas_212068599_8.pdf [file pnas_212068599_8.pdf]

**Table 8. The highest-ranking designed sequences for the SH3 domain, using two different solvation terms**

| Designer energy | Rank | Min. energy sequences by designer                         | ACE energy | ACE rank | Min. energy sequences reranked with ACE                  |
|-----------------|------|-----------------------------------------------------------|------------|----------|----------------------------------------------------------|
| -269.21         | 1    | DKRVWARYWFWGRRRQQLPFQQGQEELEIQYEPDRYWKKAKDRRGREGQIPDPVQHQ | -233.1     | 892      | DRKVQAQYWFWGRQRQMLPFRQGEELERRRDPDYYFQAQNRDGRQGIIPRPQVREG |
| -268.26         | 5    | DKKVQARYWFWGRQYQQLPFRQGEELERQRPDYYWKAQVRRGQTGLIPQPQVYWK   | -221.0     | 464      | DRKCOMQYWFWGRWRQALPARQGEVEIQQHPDYYQKAKVRRGQYGLIPRPQVREK  |
| -268.13         | 6    | DKKVQMRREFRGRRRQQLPGYQGEELERQYEPDRYWKAQCRDRGTGQIPDPVYHK   | -220.3     | 422      | DRRCRIRYWFWGRQDRMLPVRQGEVEVRQRPDYYLKAQVRRGQGGILPRPQCEEQ  |
| -267.61         | 8    | DRRVQARHRFQGRRRQQLPFDQGEELERQHPDYYWQAQVRRGQTGLIPRPVQEK    | -218.1     | 310      | DRRVKARDDFWGRRRQQLPFRKGEELERRHPRSDQQAQDRRGWQGIIPRPVVEEA  |
| -267.61         | 9    | RDKVQARYWFWGRRRQQLPFRQGEELERQYEPDRYWLKAKVRRGDEGQAPRPVQSK  | -216.0     | 114      | DRKVKARDDFWGRRRQQLPFRKGEELERQYQDDRWFKAQVRYGREGQIPKPRVESA |
| -267.43         | 11   | DKRVQARYWFWGRQYQQLPFWQGAELERQEPDYYKKGQDRRGWQGILPDPVYHK    | -211.5     | 1065     | DKKLECRDDFWGRQYQMLPARKGEELERQYHPDYYQKAKVRRGQTGKIPDRCKHK  |
| -267.11         | 13   | SYKVKARYWFWGRQYQQLPFRQGEELERIQQPDYYFKAKVRRGQYGIIPRPVQEA   | -210.9     | 508      | DKRVEVRYWFWGRQRQMLPFRQGEELERRRHPDYYIQVQVRRGQGGILPKPVKSK  |
| -266.98         | 14   | DRKVQARHRFQGRRRQQLPFDQGEELERQYQPDYWIKAQVRRGQEGQAPRPVQSK   | -206.1     | 723      | DRRVARREFRGRQRQMLPFRQGEELERQYQYQYFQARVRRGWQGLIPRPVVEEA   |
| -266.81         | 18   | DKRVWARYWFWGRRRQQLPFWQGALELRNEPDRYWKAQVQRGQGLIPDPVQHY     | -205.8     | 804      | DRRVKARYWFWGRQRMLPFWQGALELRQHPDYYQGGKVRGRTGILPRPVQEA     |
| -266.79         | 19   | DRRVKARYWFWGRDRRQLPFRQGEELERQPDYYKKGQVRYGRQLLPDPVVEHA     | -193.4     | 301      | DRRVEVRYFQGRQRQMLPADQGEELERQHPYQYQKAQDRRGQGLIPRPVKEK     |
| -222.70         | WT   | AEYVRALFDFNGNDEEDLPFKKGDILRIDKPEEQWNAEDSEGKRGMI PVPYVEKY  | -72.4      | WT       | AEYVRALFDFNGNDEEDLPFKKGDILRIDKPEEQWNAEDSEGKRGMI PVPYVEKY |

One solvation term is the standard surface area-dependent solvation term of DESIGNER, and the other is the ACE solvation term by Schaefer *et al.* [Schaefer, M., Bartels, C. & Karplus, M. (1998) *J. Mol. Biol.* **284**, 835–848]. The sequences are listed in order of increasing energies, and their rank order is given in column 1. The rank order and energies of the native sequences in each ranking is given in the last row of each table.
